# Supplementary material for: The Effect of ß-Glucan Prebiotic on Kidney Function, Uremic Toxins and Gut Microbiome in Stage 3 to 5 Chronic Kidney Disease (CKD) Predialysis Participants: A Randomized Controlled Trial
Source: MDPI journal article supplement (doi:10.3390/nu14040805), 2022-02-14
Supplement: s1 [file s1]

## Supplementary data

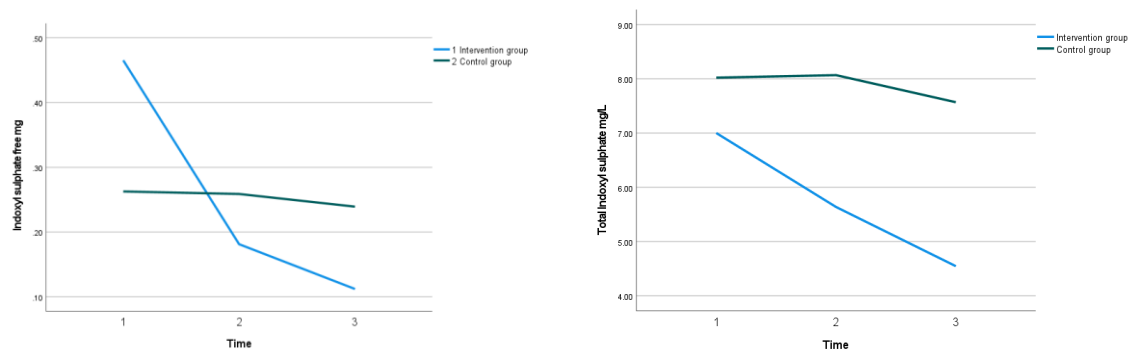

Supplementary Figure S1. Changes in the Intervention and control group in IxS total and free over time.

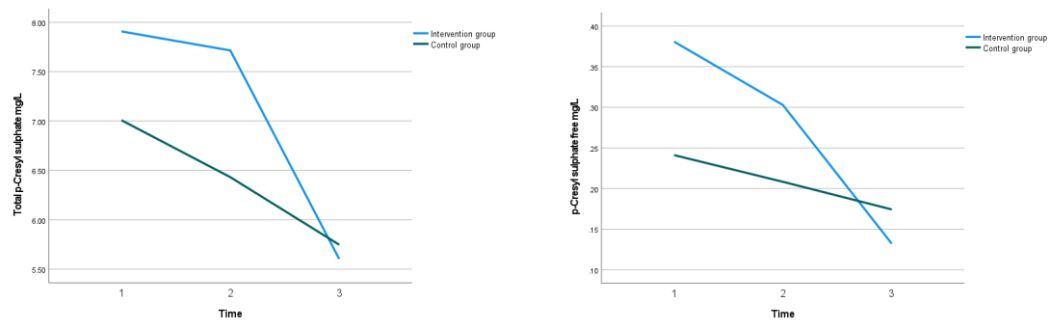

Supplementary Figure S2. Changes in the Intervention and control group in pCS total and free over time.

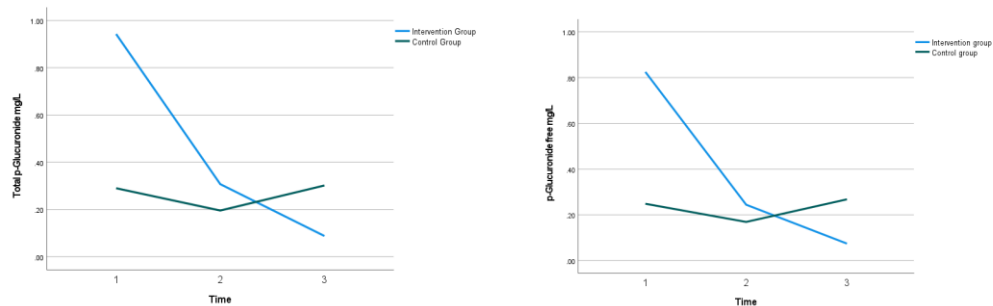

Supplementary Figure S3. Mean changes in the Intervention and control group in pCG total and free over time.

**Supplementary Table S1.** Generalized expected equations model for biochemical changes over time in the intervention over the control group (proportions).

|                                  | Model 8:<br>Outcome: CRP mg/L |           |       | Model 9:<br>Outcome: Potassium<br>mmol/L |           |       | Model 10<br>Outcome: Phosphate<br>mmol/L |           |       |
|----------------------------------|-------------------------------|-----------|-------|------------------------------------------|-----------|-------|------------------------------------------|-----------|-------|
| Parameter                        | Exp(b)                        | 95%<br>CI | P     | Exp(b)                                   | 95% CI    | P     | Exp(b)                                   | 95% CI    | P     |
| [Intervention group]             | 0.91                          | 0.34-2.41 | 0.845 | 0.99                                     | 0.92-1.07 | 0.796 | 0.99                                     | 0.83-1.14 | 0.714 |
| [week 8]                         | 0.84                          | 0.46-0.51 | 0.576 | 0.97                                     | 0.92-1.02 | 0.169 | 1.03                                     | 0.94-1.12 | 0.575 |
| [week 14]                        | 0.84                          | 0.51-1.38 | 0.491 | 1.01                                     | 0.95-1.06 | 0.789 | 1.03                                     | 0.96-1.11 | 0.379 |
| [Intervention group] * [week 8]  | 0.96                          | 0.49-1.88 | 0.912 | 1.01                                     | 0.99-1.01 | 0.293 | 1.10                                     | 0.96-1.26 | 0.185 |
| [Intervention group] * [week 14] | 2.21                          | 0.60-8.16 | 0.232 | 1.00                                     | 0.99-1.02 | 0.593 | 0.97                                     | 0.87-1.09 | 0.622 |

Exp: exponential; b = estimated model coefficient; P = P-value (Wald  $\chi^2$  test); CRP: C-reactive protein

**Supplementary Table S2.** Generalized expected equations model for anthropometrical changes over time in the intervention over the control group (means).

|                                  | Model 1:<br>Outcome: Weight (kg) |             |       | Model 2:<br>Outcome: BMI |            |       | Model 3:<br>Outcome: Waist<br>circumference (cm) |            |       | Model 4<br>Outcome: MUAC (cm) |            |       |
|----------------------------------|----------------------------------|-------------|-------|--------------------------|------------|-------|--------------------------------------------------|------------|-------|-------------------------------|------------|-------|
| Parameter                        | Exp(b)                           | 95% CI      | P     | Exp(b)                   | 95% CI     | P     | Exp(b)                                           | 95% CI     | P     | Exp(b)                        | 95% CI     | P     |
| [Intervention group]             | 4.50                             | -5.95-14.96 | 0.398 | 1.78                     | -1.51-5.11 | 0.288 | 5.05                                             | -1.98-13.0 | 0.150 | 0.85                          | -1.73-3.43 | 0.518 |
| [week 8]                         | -0.65                            | -1.34-0.05  | 0.070 | -0.25                    | -0.50-0.10 | 0.057 | -0.85                                            | -1.74-0.31 | 0.059 | -0.20                         | -0.58-0.17 | 0.291 |
| [week 14]                        | -0.84                            | -2.05-0.39  | 0.181 | -0.33                    | -0.78-0.11 | 0.147 | -0.75                                            | -1.75-0.25 | 0.142 | -0.25                         | -0.78-0.28 | 0.362 |
| [Intervention group] * [week 8]  | 0.88                             | -1.07-1.25  | 0.882 | 0.02                     | -0.48-0.49 | 0.985 | -0.46                                            | -1.78-0.86 | 0.492 | -0.06                         | -0.68-0.56 | 0.840 |
| [Intervention group] * [week 14] | 0.43                             | -1.35-2.21  | 0.633 | 0.15                     | -0.56-0.87 | 0.678 | -0.96                                            | -2.70-0.80 | 0.286 | -0.45                         | -1.32-0.35 | 0.252 |

Exp: exponential; b = estimated model coefficient; P = P-value (Wald  $\chi^2$  test); BMI: body mass index

**Supplementary Table S3.** Generalized expected equations model for dietary intake changes over time in the intervention over the control group (proportions).

|                                     | Model 1:<br>Outcome: Energy<br>(kcal) |           |       | Model 2:<br>Outcome: Protein<br>(g) |           |       | Model 3:<br>Outcome: Total fat<br>(g) |           |              | Model 4:<br>Outcome: Saturated<br>fat (g) |           |       | Model 5<br>Outcome: Diet fibre<br>(g) |           |       | Model 6<br>Outcome: Potassium<br>(mg) |            |       | Model 7<br>Outcome: Phosphate<br>(mg) |           |       | Model 8<br>Outcome: Sodium<br>(mg) |           |       |
|-------------------------------------|---------------------------------------|-----------|-------|-------------------------------------|-----------|-------|---------------------------------------|-----------|--------------|-------------------------------------------|-----------|-------|---------------------------------------|-----------|-------|---------------------------------------|------------|-------|---------------------------------------|-----------|-------|------------------------------------|-----------|-------|
| Parameter                           | Exp(b)                                | 95% CI    | P     | Exp(b)                              | 95% CI    | P     | Exp(b)                                | 95% CI    | P            | Exp(b)                                    | 95% CI    | P     | Exp(b)                                | 95% CI    | P     | Exp(b)                                | 95% CI     | P     | Exp(b)                                | 95% CI    | P     | Exp(b)                             | 95% CI    | P     |
| [Intervention group]                | 0.96                                  | 0.80-1.17 | 0.693 | 1.10                                | 0.89-1.3  | 0.375 | 0.98                                  | 0.77-1.25 | 0.858        | 1.08                                      | 0.83-1.40 | 0.556 | 1.05                                  | 0.88-1.24 | 0.603 | 1.05                                  | 0.88-1.26  | 0.541 | 1.12                                  | 0.91-1.34 | 0.282 | 0.72                               | 0.71-1.28 | 0.787 |
| [week 8]                            | 0.94                                  | 0.83-1.06 | 0.312 | 0.93                                | 0.80-1.10 | 0.407 | 0.85                                  | 0.72-1.00 | <b>0.035</b> | 0.88                                      | 0.74-1.04 | 0.135 | 1.10                                  | 0.98-1.22 | 0.093 | 1.00                                  | 0.90-1.11  | 0.945 | 0.96                                  | 0.83-1.11 | 0.592 | 0.70                               | 0.70-1.11 | 0.297 |
| [week 14]                           | 0.90                                  | 0.76-1.08 | 0.266 | 0.95                                | 0.78-1.15 | 0.601 | 0.84                                  | 0.64-1.10 | 0.203        | 0.83                                      | 0.63-1.10 | 0.206 | 1.10                                  | 0.95-1.24 | 0.219 | 1.02                                  | 0.88-1.20  | 0.768 | 0.97                                  | 0.80-1.12 | 0.822 | 0.62                               | 0.62-1.16 | 0.322 |
| [Intervention group] *<br>[week 8]  | 1.00                                  | 0.84-1.19 | 0.990 | 0.96                                | 0.80-1.17 | 0.695 | 1.08                                  | 0.87-1.34 | 0.455        | 0.78                                      | 0.80-1.21 | 0.833 | 0.91                                  | 0.78-1.07 | 0.294 | 0.96                                  | 0.83-1.11  | 0.962 | 0.95                                  | 0.80-1.13 | 0.555 | 0.73                               | 0.73-1.44 | 0.879 |
| [Intervention group] *<br>[week 14] | 1.08                                  | 0.85-1.36 | 0.530 | 0.98                                | 0.78-1.23 | 0.903 | 1.15                                  | 0.82-1.60 | 0.403        | 0.80                                      | 0.80-1.57 | 0.501 | 0.93                                  | 0.77-1.12 | 0.458 | 0.93                                  | 0.76--1.13 | 0.934 | 0.96                                  | 0.76-1.22 | 0.761 | 0.80                               | 0.81-1.86 | 0.341 |

Exp: exponential; b = estimated model coefficient; P = P-value (Wald  $\chi^2$  test)

**Supplementary Table S4.** Dietary adherence scores for the intervention and control group over time.

| Group        | Baseline<br>(%) | 4 weeks<br>(%) | Week 8<br>(%) | Week 14<br>(%) |
|--------------|-----------------|----------------|---------------|----------------|
| Intervention | 89.4            | 93.3           | 94.6          | 94.2           |
| Control      | 85.6            | 92.3           | 91.0          | 91.7           |

**Supplementary Table S5.** Relative abundances.

| Genera                   | Adj p value (Welch) | Adj p value (Wilcoxin) | Relative abundance overall | Relative abundance within Control | Relative abundance within Intervention | Difference between groups | Difference within groups | Effect size | Overlap between groups |
|--------------------------|---------------------|------------------------|----------------------------|-----------------------------------|----------------------------------------|---------------------------|--------------------------|-------------|------------------------|
| <i>Prevotella</i>        | 0.27                | 0.36                   | 3.23                       | 2.29                              | 3.70                                   | 1.03                      | 7.96                     | 0.12        | 0.44                   |
| <i>Faecalibacterium</i>  | 0.63                | 0.68                   | 6.36                       | 6.36                              | 6.35                                   | 0.11                      | 2.12                     | 0.04        | 0.48                   |
| <i>Roseburia</i>         | 0.14                | 0.04                   | 5.54                       | 5.92                              | 5.12                                   | -0.77                     | 2.84                     | -0.23       | 0.38                   |
| <i>Blautia</i>           | 0.46                | 0.93                   | 5.47                       | 5.37                              | 5.52                                   | 0.03                      | 1.78                     | 0.02        | 0.49                   |
| <i>Bifidobacterium</i>   | 0.74                | 0.93                   | 1.94                       | 1.69                              | 2.21                                   | -0.13                     | 6.51                     | -0.02       | 0.49                   |
| <i>Catenibacterium</i>   | 0.51                | 0.61                   | 1.55                       | 1.70                              | -1.16                                  | -0.34                     | 8.87                     | -0.04       | 0.48                   |
| <i>Bacteroides</i>       | 0.75                | 0.47                   | 5.18                       | 5.44                              | 4.87                                   | -0.39                     | 3.52                     | -0.10       | 0.45                   |
| <i>Ruminococcus</i>      | 0.55                | 0.72                   | 4.33                       | 4.39                              | 4.28                                   | -0.19                     | 2.51                     | -0.05       | 0.47                   |
| <i>Ruminococcus</i> 2    | 0.62                | 0.75                   | 4.15                       | 4.20                              | 4.11                                   | -0.10                     | 2.00                     | -0.04       | 0.48                   |
| <i>Dorea</i>             | 0.20                | 0.27                   | 3.74                       | 3.85                              | 3.67                                   | -0.32                     | 1.86                     | -0.14       | 0.43                   |
| <i>Holdemanella</i>      | 0.85                | 0.81                   | 3.11                       | 3.12                              | 3.10                                   | -0.19                     | 7.76                     | -0.03       | 0.48                   |
| <i>Fusicatenibacter</i>  | 0.91                | 0.86                   | 3.04                       | 2.93                              | 3.15                                   | 0.09                      | 2.55                     | 0.03        | 0.49                   |
| <i>Coprococcus</i>       | 0.88                | 0.84                   | 3.48                       | 3.49                              | 3.48                                   | -0.09                     | 2.14                     | -0.03       | 0.48                   |
| <i>Clostridium</i> _IV   | 0.56                | 0.33                   | 3.38                       | 3.63                              | 3.17                                   | -0.31                     | 2.15                     | -0.12       | 0.44                   |
| <i>Clostridium</i> _XIVa | 0.37                | 0.37                   | 2.63                       | 2.45                              | 2.92                                   | 0.39                      | 2.99                     | 0.11        | 0.44                   |

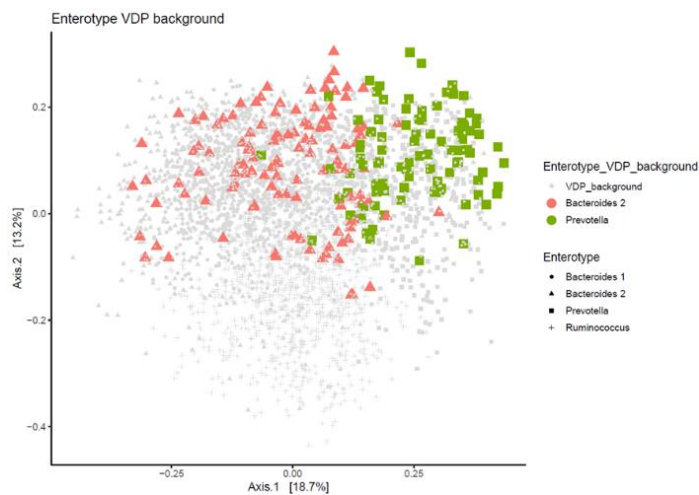

**Supplementary Figure S4.** Consort 10 cohort mapped onto the FGFP background to determine the enterotype for each sample.
